# Supplementary figures and images for: Hydration in aqueous NaCl
Source: Royal Society of Chemistry journal article supplement (doi:10.1039/d2cp00162d), 2022-01-01

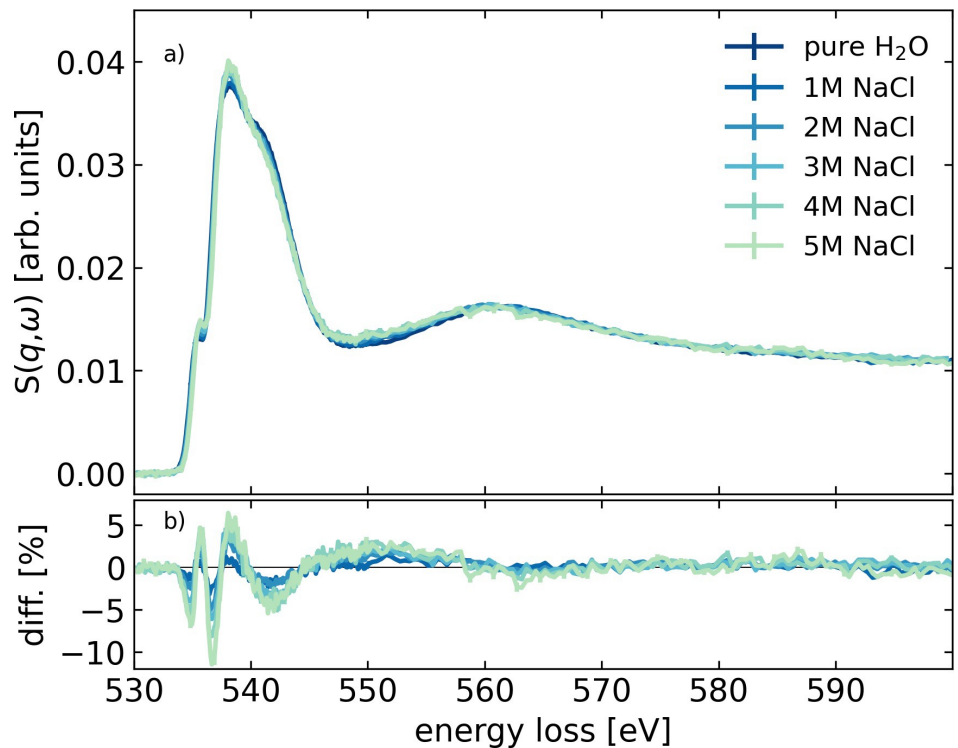

Supplement: d2cp00162d1.pdf [file d2cp00162d1.pdf]
